# Supplementary material
Source: PubMed Central journal article supplement (PMC3182718)
Supplement: 1100702108_pnas.201100702SI.pdf [file 1100702108_pnas.201100702SI.pdf]

# Supporting Information

Long et al. 10.1073/pnas.1100702108

## SI Materials and Methods

**RT-PCR.** Cells were treated as described for individual experiments, and total RNA was isolated using TRIzol (Invitrogen) and treated with DNase (Promega) in the presence of 20 units of RNase Block (Invitrogen). Following DNase treatment, the RNA was phenol:chloroform extracted to remove the DNase. Two micrograms of RNA was used to make cDNA using SuperScript II (Invitrogen). One microliter of this cDNA reaction was then used to perform PCR, using Taq polymerase (Invitrogen).

**Enzyme-Linked Immunosorbant Assays.** ELISAs were performed as per the manufacturer's instructions. IL6 was from BD Biosciences, IL12 was from Peprotech, and TNF $\alpha$  was from Peprotech.

**Intravital Measurements.** The average rolling velocity was measured in each vessel by monitoring the average length of time required for 20 randomly selected leukocytes to roll a distance of 100  $\mu\text{m}$  ( $\mu\text{m}/\text{sec}$ ).

**Internalization of FITC-FSL1/GML.** Bone marrow-derived macrophages were isolated from wild-type and TLR2 $^{-/-}$  mice and cultured on glass coverslips. The cells were incubated on ice for 10 min in the presence of 10  $\mu\text{g}/\text{mL}$  FITC-FSL1 or FITC-GML to allow ligands binding and then returned to 37  $^{\circ}\text{C}$  for 60 min. Cells were then fixed for 10 min in 4.5% paraformaldehyde, stained for the golgi marker Giantin (1:250, Abcam), and imaged using confocal microscopy.

**Neutrophil Whole Blood and Lymph Node Counts.** Male LysM-eGFP mice, which express green fluorescent protein predominantly in neutrophils, were given an intrascrotal injection of 150  $\mu\text{L}$  of saline (4.5 h) or an i.p. injection of 300  $\mu\text{L}$  of saline (16 h). Whole blood and lymph nodes were isolated from these animals and the percent neutrophils per total cells was evaluated using flow cytometry for GFP $^{\text{hi}}$  cells.

**Cremaster Histology.** Wild-type male C57/B6 mice were given an intrascrotal injection of 150  $\mu\text{L}$  of saline or saline containing various proinflammatory ligands, or superfused with buffer containing proinflammatory ligands, as described in the results. Four hours following ligand administration the cremaster muscle was exteriorized, cut off, and fixed in 10% formalin. The cremaster tissue was embedded in paraffin and 5- $\mu\text{m}$  sections were cut and stained with hematoxylin and eosin. The numbers of lymphocytes, monocytes, and neutrophils in the post capillary venules were counted, and differential percentages were scored.

**In Vitro Bacterial Culture.** In vitro, *E. coli* overnight cultures were diluted 1:20 in Luria Broth and distributed in 100- $\mu\text{L}$  aliquots in a 96-well fluorescent plate, along with increasing amounts of LTA or GML in 5  $\mu\text{L}$  of saline and grown at 37  $^{\circ}\text{C}$ . The OD $_{600}$  and luminescence were monitored every 20 min using a Wallac Victor $^2$  1420, Multilabel Counter (Perkin-Elmer).





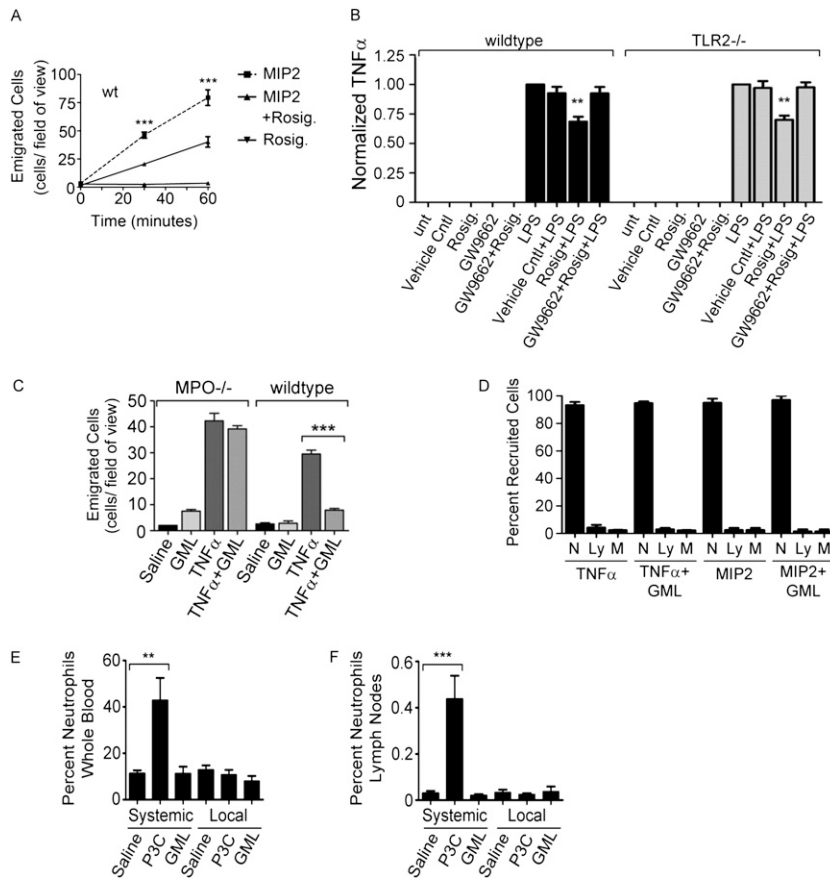

**Fig. S5.** (A) Wild-type mice were evaluated using intravital microscopy for the number of neutrophils emigrated into the cremaster tissue following superfusion of MIP2 (2.5  $\mu$ M), MIP2 (2.5  $\mu$ M) + Rosiglitazone (5  $\mu$ M), or Rosiglitazone alone (5  $\mu$ M). (B) Wild-type and TLR2 $^{-/-}$  bone marrow-derived macrophages were treated as indicated and evaluated for the production of the cytokine TNF $\alpha$  in response to LPS (100 ng/mL), in the presence or absence of the PPAR $\gamma$  agonist Rosiglitazone (10  $\mu$ M) and/or the PPAR $\gamma$  inhibitor GW9662 (10  $\mu$ M). (C) MPO $^{-/-}$  mice evaluated using intravital microscopy for the number of neutrophils emigrated into the cremaster tissue following intrascrotal injections of 150  $\mu$ L of saline containing GML (37.5 ng/g), TNF $\alpha$  (20 ng/g), or TNF $\alpha$ +GML. (D) Male mice were treated with an intrascrotal injection of TNF $\alpha$  (20 ng/g) in the presence or absence of GML (37.5 ng/g) for 4.5 h or the cremaster was exteriorized and treated with MIP2 (5  $\mu$ M) in the presence or absence of GML (5  $\mu$ g/mL) for 60 min. The cremasters were then excised and fixed and stained with hematoxylin and eosin and differential cell counts were determined. (E and F) Percentages of neutrophils (GFP $^{hi}$  cells) were determined by flow cytometry from whole blood and isolated lymph nodes from LysM-eGFP mice following systemic administration of 300  $\mu$ L of saline alone or saline containing Pam3CSK4 (100  $\mu$ g) or GML (200  $\mu$ g) for 16 h, or a local administration of 150  $\mu$ L of saline alone or saline containing Pam3CSK4 (10 ng/g) or GML (37.5 ng/g) for 4.5 h.
